# Supplementary material for: GLOBGM v1.0: a parallel implementation of a 30 arcsec PCR-GLOBWB-MODFLOW global-scale groundwater model
Source: Copernicus journal article supplement (doi:10.5194/gmd-17-275-2024), 2024-01-12
Supplement: Supplementary file 2 [file gmd-17-275-2024-supplement.zip]

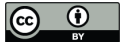

*Supplement of*

## **GLOBGM v1.0: a parallel implementation of a 30 arcsec PCR-GLOBWB-MODFLOW global-scale groundwater model**

**Jarno Verkaik et al.**

*Correspondence to:* Jarno Verkaik ([jarno.verkaik@deltares.nl](mailto:jarno.verkaik@deltares.nl))

- [gmd-17-275-2024-supplement-title-page.pdf](#)
- [globgm\\_1958-2015\\_diff.gif](#)
- [globgm\\_1958-2015\\_diff\\_avg.gif](#)
- [verkaik\\_et\\_al\\_gmd\\_supplemental.pdf](#)

The copyright of individual parts of the supplement might differ from the article licence.
