# Supplementary material for: GLOBGM v1.0: a parallel implementation of a 30 arcsec PCR-GLOBWB-MODFLOW global-scale groundwater model
Source: Copernicus journal article supplement (doi:10.5194/gmd-17-275-2024), 2024-01-12
Supplement: Supplementary file 3 [file gmd-17-275-2024-supplement.zip]

Archive with 4 entries (4 files):
- gmd-17-275-2024-supplement-title-page.pdf
- verkaik_et_al_gmd_supplemental.pdf
- globgm_1958-2015_diff_avg.gif
- globgm_1958-2015_diff.gif
