# Supplementary figures and images for: GLOBGM v1.0: a parallel implementation of a 30 arcsec PCR-GLOBWB-MODFLOW global-scale groundwater model
Source: Copernicus journal article supplement (doi:10.5194/gmd-17-275-2024), 2024-01-12

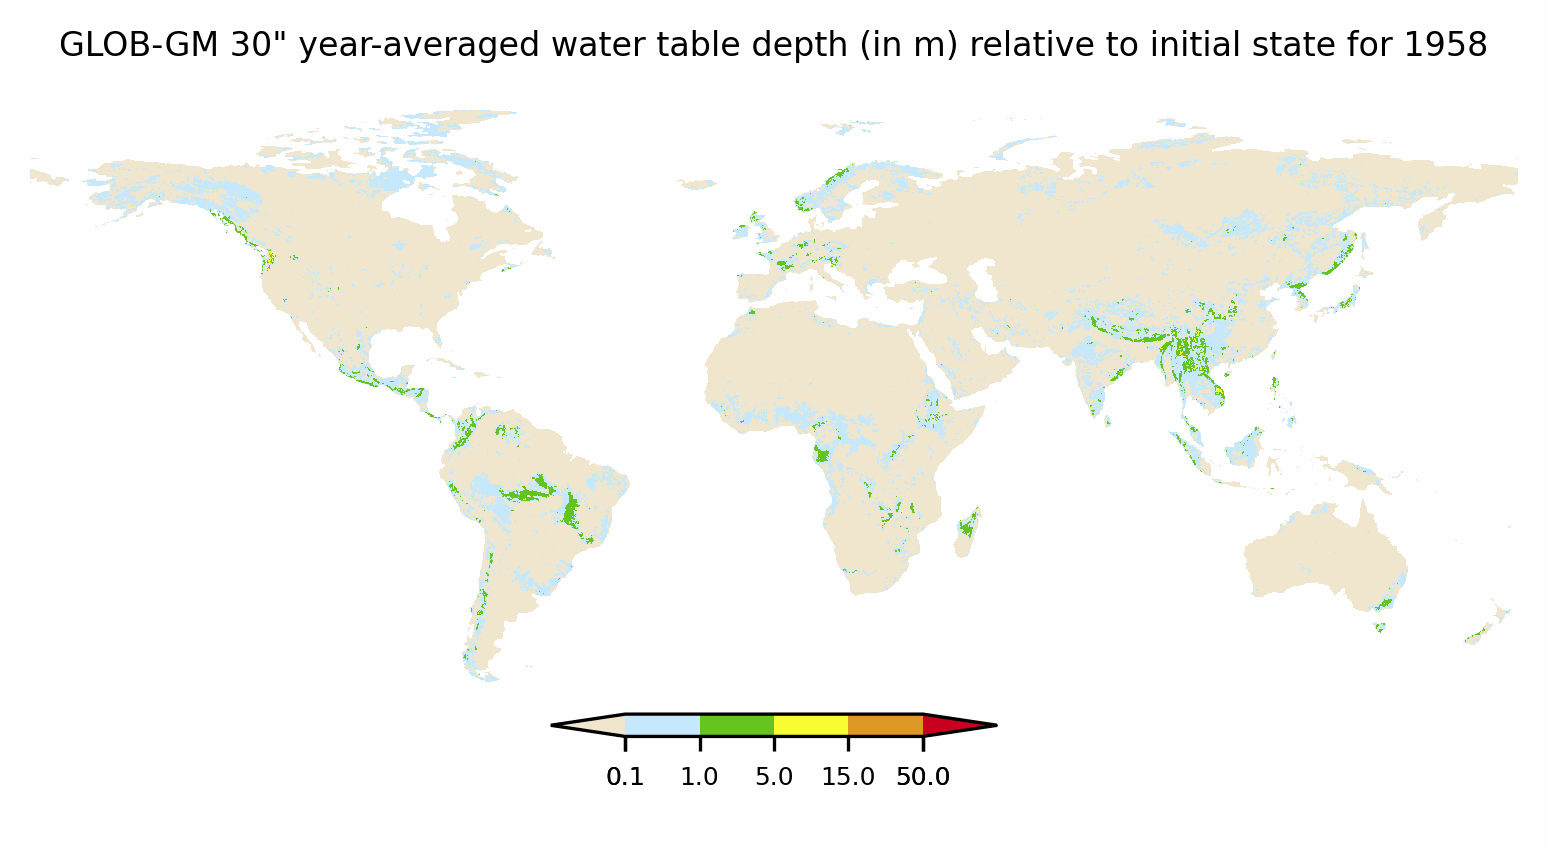

Supplement: Supplementary file 3 [file gmd-17-275-2024-supplement.zip › globgm_1958-2015_diff_avg.gif]

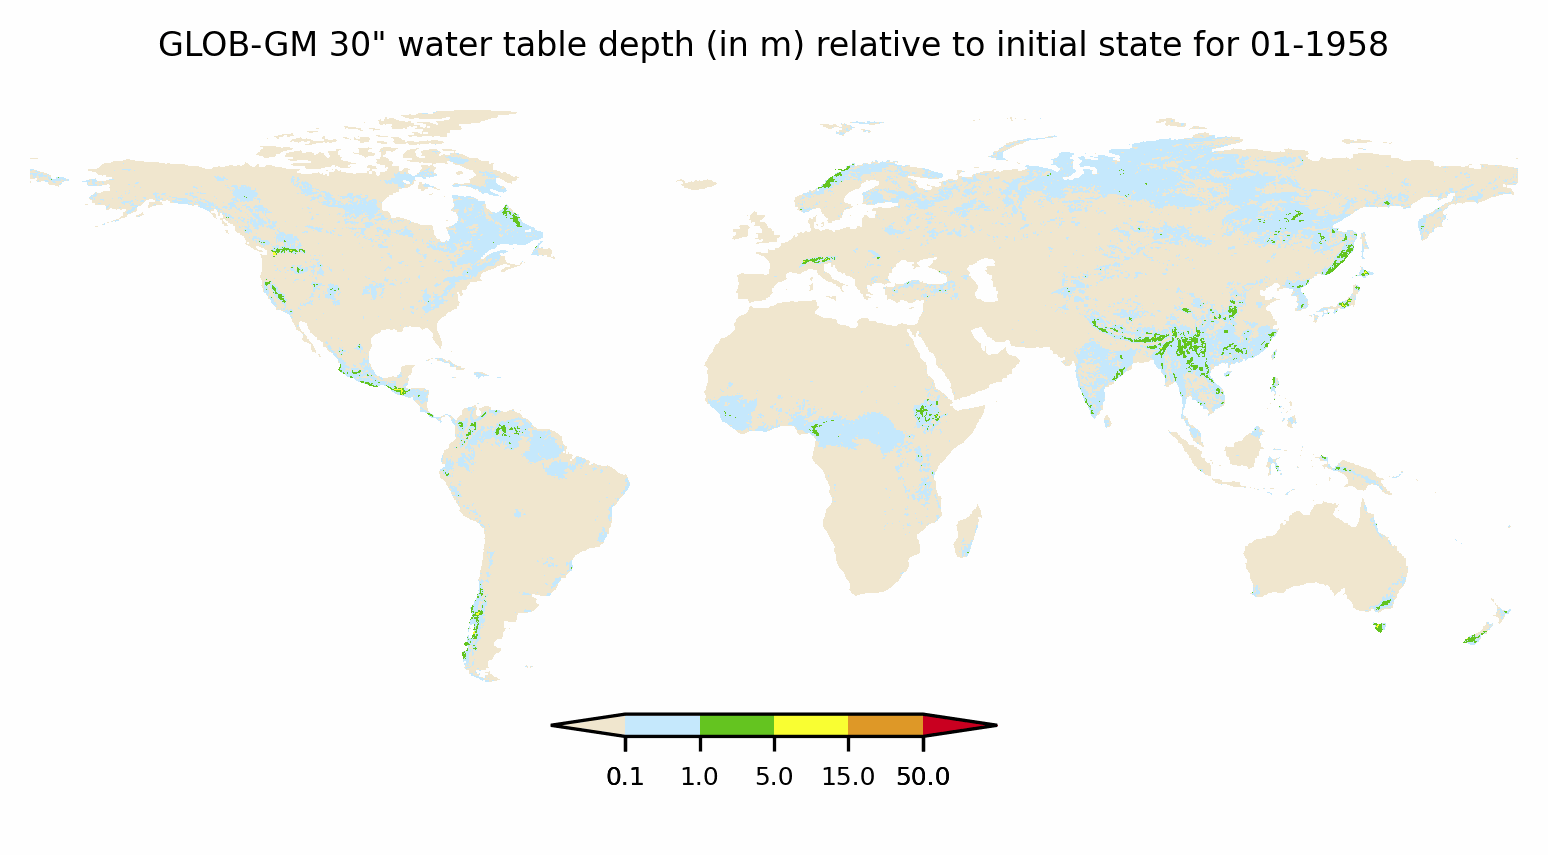

Supplement: Supplementary file 3 [file gmd-17-275-2024-supplement.zip › globgm_1958-2015_diff.gif]
